# Supplementary material for: Guideline implementation in the Canadian chiropractic setting: a pilot cluster randomized controlled trial and parallel study
Source: PubMed Central journal article supplement (PMC6636122; doi:10.1186/s12998-019-0253-z), 2019-07-17
Supplement: 12998_2019_253_MOESM2_ESM.pdf [file 12998_2019_253_MOESM2_ESM.pdf]

Additional file 2. Criteria to assess feasibility

| <b>Construct</b>              | <b>Parameter</b>                                                                                                                                 |
|-------------------------------|--------------------------------------------------------------------------------------------------------------------------------------------------|
| <b>Chiropractors</b>          |                                                                                                                                                  |
| <b>Eligibility proportion</b> |                                                                                                                                                  |
| Recruitment                   | Trial acceptance rate: $\geq 20\%$ agree to participate within six weeks.<br>Target population = 40 (assuming an 80% retention rate)             |
| Retention                     | 80% of participants will complete three months of patient follow-up                                                                              |
| Adherence to protocol         | $>80\%$ of participants will complete all 3 webinars, associated quizzes, 2 clinical vignettes, and a self- management learning module.          |
| <b>Patients</b>               |                                                                                                                                                  |
| Recruitment                   | Trial acceptance rate: 5 patients per clinician within 6 weeks of recruitment notice. Target population = 160 (assuming an 80% recruitment rate) |
| Retention                     | $\geq 80\%$ will complete patient encounter forms (VAS, NDI, and PSQ-18) and follow-up at 3-months                                               |
| Adherence to protocol         | 80% will attend regular treatment sessions twice/week.<br>$> 80\%$ will comply with prescribed home exercise and physical activity.              |
