# Supplementary material for: Guideline implementation in the Canadian chiropractic setting: a pilot cluster randomized controlled trial and parallel study
Source: Springer Nature journal article supplement (doi:10.1186/s12998-019-0253-z), 2019-07-16
Supplement: MOESM1 [file 16937810]

Additional file 1. Outcome measures

| <b>Outcome</b>                                     | <b>Source</b>              | <b>Description of measures</b>                                                                                                                                                                                                                                                                                                                                                               | <b>Data collection time points</b> |
|----------------------------------------------------|----------------------------|----------------------------------------------------------------------------------------------------------------------------------------------------------------------------------------------------------------------------------------------------------------------------------------------------------------------------------------------------------------------------------------------|------------------------------------|
| <b>Feasibility</b>                                 |                            |                                                                                                                                                                                                                                                                                                                                                                                              |                                    |
| Recruitment                                        | Chiropractors and Patients | <p>Measured as a proportion of chiropractors and patients potentially eligible for participating.</p> <p>Eligibility rate = number of eligible chiropractors and patients divided by the number of invited chiropractors or patients.</p> <p>Participation rate = number of chiropractors and patients agreeing to participate divided by number of eligible chiropractors and patients.</p> | Initial Stage                      |
| Adherence to protocol                              | Chiropractors              | For those randomized to intervention arm, measured through the rates of attendance of all 3 webinars, associated quizzes, completion of 2 clinical vignettes and the self-management learning module.                                                                                                                                                                                        | Within 6 weeks of assignment       |
|                                                    | Patients                   | Rate of adherence to follow-up visits, prescribed home exercise and physical activity                                                                                                                                                                                                                                                                                                        | Baseline 3 months                  |
| Adherence perception (knowledge and self-efficacy) | Chiropractors and patients | Completion of questionnaires                                                                                                                                                                                                                                                                                                                                                                 | Baseline 3 months                  |

|           |                            |                                                                                                                                                                                      |          |          |
|-----------|----------------------------|--------------------------------------------------------------------------------------------------------------------------------------------------------------------------------------|----------|----------|
| Retention | Chiropractors and patients | Retention rate = number of chiropractors or patients who completed follow-up of all outcome measures at 3 months divided by number of chiropractors or patients who were randomized. | Baseline | 3 months |
|           | Chiropractors              | Rate of completion of patient encounter forms and questionnaires including levels of knowledge and self-efficacy and the BAP.                                                        | Baseline | 3 months |
|           | Patients                   | Rate of completion of patient encounter forms and questionnaires including the BAP, Visual Analogue Scale (VAS), Neck Disability Index (NDI) and satisfaction with care              | Baseline | 3 months |
